# Supplementary material for: Defective IL-17- and IL-22-dependent mucosal host response to Candida albicans determines susceptibility to oral candidiasis in mice expressing the HIV-1 transgene
Source: PubMed Central journal article supplement (PMC4213580; doi:10.1186/s12865-014-0049-9), 2014-10-26
Supplement: 12865_2014_49_MOESM1_ESM.pdf [file 12865_2014_49_MOESM1_ESM.pdf]

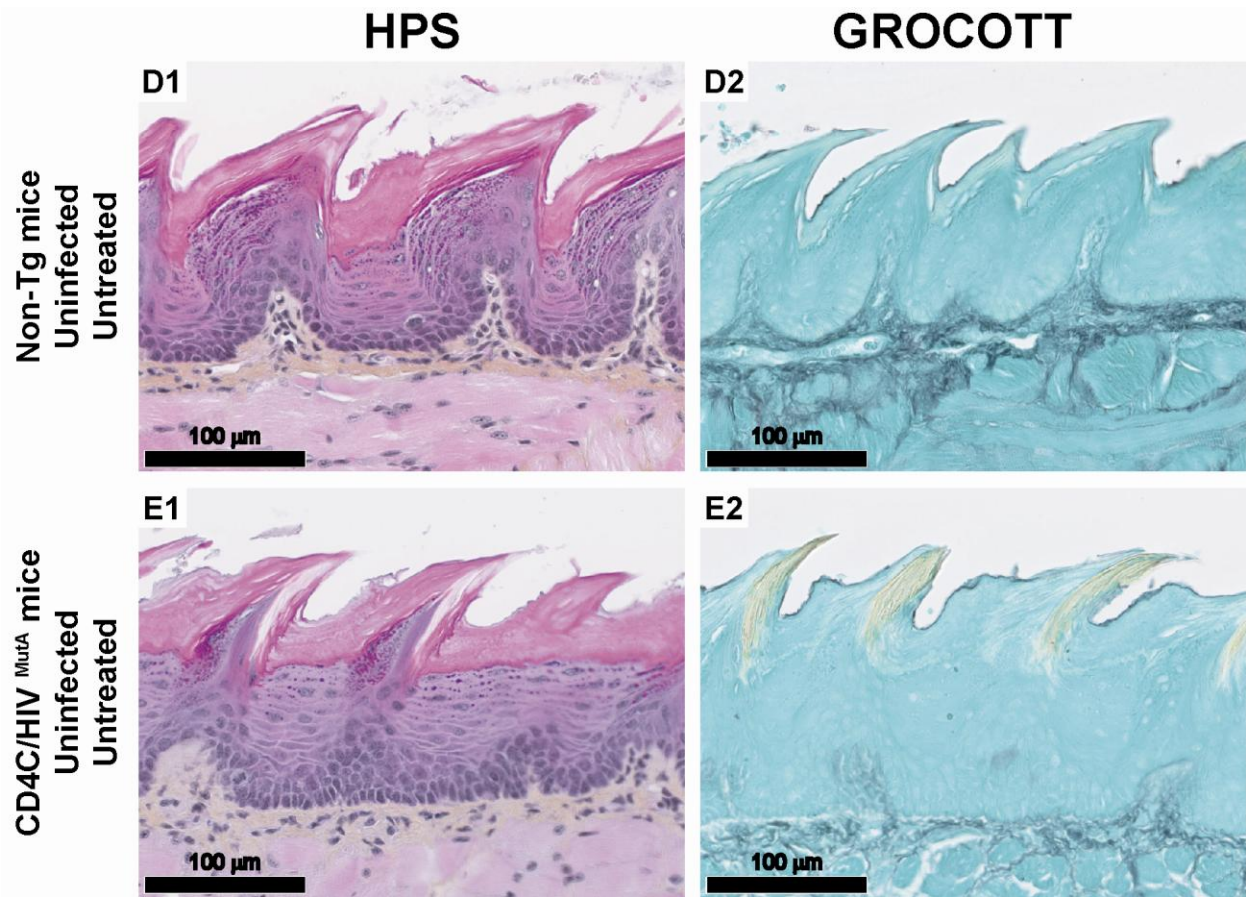

**Additional file 1. Histopathology of tongues from control uninfected and untreated CD4C/HIV<sup>MutA</sup> Tg (E1, E2) and non-Tg mice (D1, D2).** Tissues were stained with hematoxylin ploxine saffron (HPS) or Gomori-Grocott methenamine silver. Images are representative of six mice per group with consistent results.
